## 24 ABSTRACT

25 *Juglans* (walnuts), the most speciose genus in the walnut family (Juglandaceae)  
26 represents most of the family's commercially valuable fruit and wood-producing trees.  
27 It includes several species used as rootstock in agriculture for their resistance to various  
28 abiotic and biotic stressors. We present the full structural and functional genome  
29 annotations of six *Juglans* species and one outgroup within Juglandaceae (*Juglans regia*, *J.*  
30 *cathayensis*, *J. hindsii*, *J. microcarpa*, *J. nigra*, *J. sigillata* and *Pterocarya stenoptera*) produced  
31 using BRAKER2 semi-supervised gene prediction pipeline and additional tools. For  
32 each annotation, gene predictors were trained using 19 tissue-specific *J. regia*  
33 transcriptomes aligned to the genomes. Additional functional evidence and filters were  
34 applied to multi-exonic and mono-exonic putative genes to yield between 27,000 and  
35 44,000 high-confidence gene models per species. Comparison of gene models to the  
36 BUSCO embryophyta dataset suggested that, on average, genome annotation  
37 completeness was 85.6%. We utilized these high-quality annotations to assess gene  
38 family evolution within *Juglans* and among *Juglans* and selected Eurosid species. We  
39 found notable contractions in several gene families in *J. hindsii*, including disease  
40 resistance-related Wall-associated Kinase (WAK) and *Catharanthus roseus* Receptor-like  
41 Kinase (CrRLK1L) and others involved in abiotic stress response. Finally, we confirmed  
42 an ancient whole genome duplication that took place in a common ancestor of  
43 Juglandaceae using site substitution comparative analysis.

## 45 INTRODUCTION

46 It is anticipated that new genomic resources for *Juglans* (walnuts) will lead to improved  
47 timber and nut production by accelerating development of advanced agriculture,  
48 breeding efforts, and resource management techniques for the genus. Already, these  
49 practices are beneficiaries of the genomic analyses and tool development potentiated by  
50 the growing pool of *Juglans* sequence data (Martínez-García *et al.* 2017; Bernard *et al.*  
51 2018; Marrano *et al.* 2018; Famula *et al.* 2019; Zhu *et al.* 2019). The recent publication of  
52 the unannotated draft reference genomes of six *Juglans* species: *J. nigra* (Eastern black  
53 walnut), *J. hindsii* (Hinds black walnut), *J. microcarpa* (Texas walnut), *J. sigillata* (iron  
54 walnut), *J. cathayensis* (Chinese walnut), *J. regia* (Persian or English walnut) and a  
55 member of the sister group to *Juglans*, *Pterocarya stenoptera* (Chinese wingnut) greatly  
56 expands the existing resource and provides an unprecedented opportunity to apply  
57 tools such as genomic selection to the Juglandaceae (Stevens *et al.* 2018).

58  
59 The genomes considered are Eurasian and North American species from across the  
60 three sections of the genus, *Cardiocaryon*, *Dioscaryon* (syn. sect. *Juglans*) and *Rhysocaryon*  
61 (Figure 1). These species were selected for their historical and agricultural importance  
62 and for their phylogenetic placements, which span the breadth of the genus. The North  
63 American species *J. nigra*, *J. hindsii*, and *J. microcarpa* are members of sect. *Rhysocaryon*

64 and grow in riparian forests in the eastern, western and southern United States,  
65 respectively. *J. hindsii* and *J. microcarpa* are distributed in moderately dispersed  
66 populations. Conversely, *J. nigra*'s range is more contiguous and expansive and  
67 overlaps with the northeastern distribution of *J. microcarpa*. Among these, *J. nigra* is  
68 especially valued for its high-quality timber, cold-hardiness, and disease resistance  
69 (Beineke 1983; Settle *et al.* 2015; Chakraborty *et al.* 2015; Chakraborty *et al.* 2016). *J. hindsii*  
70 is characterized as vigorous, drought tolerant, and resistant to *Armillaria* root rot (honey  
71 fungus) (Buzo *et al.* 2009). The need for disease-resistant and climate-tolerant cultivars  
72 for nut production has driven the use of *J. nigra*, *J. hindsii* and *J. microcarpa* in  
73 hybridization trials (Browne *et al.* 2015). These species contribute resistance to many  
74 soilborne pathogens, including *Phytophthora* and a range of nematodes.

75  
76 The sampled Eurasian species include *J. regia*, the predominant nut producer of all  
77 cultivated *Juglans*. *J. regia*'s western native range continues into Southeastern Europe, an  
78 impressive relic of silk road trading that underlines its agricultural suitability  
79 (Pollegioni *et al.* 2015). *J. sigillata* is phylogenetically adjacent to *J. regia* as the only other  
80 species of sect. *Dioscaryon*, and, like *J. regia*, is valued for both its timber and nut  
81 (Weckerle *et al.* 2005). Despite their divergent morphology, which includes number of  
82 leaflets and nut characteristics, a growing body of molecular evidence suggests that *J.*  
83 *regia* and *J. sigillata* may not qualify as separate species (Gunn *et al.* 2010; Zhao *et al.*  
84 2018). *J. sigillata* grows sympatrically with *J. regia* and *J. cathayensis* (sect. *Cardiocaryon*) in  
85 southwestern China, but the distribution of *J. cathayensis* extends beyond the sympatric  
86 zone several hundred kilometers eastward to the coastline and northward towards the  
87 Gobi desert. *J. cathayensis* is endangered in its natural range in China (Zhang *et al.* 2015)  
88 and is evaluated in breeding programs for its resistance to lesion nematodes. The  
89 outgroup, *P. stenoptera* is also native to southeastern China and is used for ornamental  
90 planting, timber, and medicinal extracts. *P. stenoptera* has been integrated into  
91 hybridization trials as a non-viable (inconsistent grafting) rootstock for its resistance to  
92 *Phytophthora* (Browne *et al.* 2011).

93  
94 Stevens *et. al* (2018) annotated a set of microsyntenic regions containing polyphenol  
95 oxidase loci to confirm a gene duplication in an ancestral *Juglans*. Here, we describe the  
96 full gene annotations of these diploid genomes, a critical missing component to their  
97 full utilization as a genomic resource. We demonstrate their utility by investigating the  
98 genomes in a comparative manner. First, we view the evolution of gene families in  
99 *Juglans* across the phylogeny. Second, we leverage the annotations for a comparative  
100 genomic analysis to date an ancient whole genome duplication in an ancestral species of  
101 Juglandaceae.

102  
103 **RESULTS**

#### 104 *Semi-supervised Gene Prediction*

105 Errors introduced from genome annotation often lead to inconsistent gene expression  
106 estimates and contribute to the inaccurate characterization of gene space, gene family  
107 evolution and timing of whole genome duplications (Vijay *et al.* 2013, Denton *et al.*  
108 2014). Our approach was applied across all seven genomes that leveraged RNA-Seq  
109 reads generated from tissue-specific libraries of *J. regia* (Table 1). This approach took  
110 advantage of the deep sequencing by directly aligning reads to the genome to resolve  
111 challenges associated with reliance on error-prone and often fragmented *de novo*  
112 assembled transcripts (Hoff *et al.* 2016). The bias introduced by using RNA-Seq reads  
113 solely from *J. regia* for the annotation of all genomes was partially mitigated by the  
114 semi-supervised training of the gene prediction tool, AUGUSTUS, included in  
115 BRAKER. The AUGUSTUS component utilizes the evidence of successful alignments to  
116 learn features of the genome in question and propose gene models. Repeat libraries  
117 were generated and subsequently used for masking between roughly 44% and 48% of  
118 the genomes prior to read alignment (Table 2; Table S1). The raw reads aligned across  
119 the genomes at rates inversely proportional to their phylogenetic distance from *J. regia*.  
120 Average alignment rates across *J. regia* transcriptome libraries are displayed as total  
121 mapped (concordantly mapped): 87.1% (84.2%) in *J. regia*, 88.3% (78.7%) in *J. sigillata*,  
122 51.8% (49.1%) in *J. cathayensis*, 68.0% (49.0%) in *J. nigra*, 41.0% (38.7%) in *J. microcarpa*,  
123 49.7% (48.0%) in *J. hindsii* and 33.2% (31.2%) in the outgroup, *P. stenoptera*. Initial gene  
124 prediction estimates from BRAKER2 ranged from 81,753 (*J. hindsii*) to 133,963 (*P.*  
125 *stenoptera*) (Table S2). Filtering of BRAKER2 models considered completeness (start and  
126 stop codon present), isoforms, exon lengths, intron lengths, and splice sites. These  
127 considerations provided a reduced set of gene models for each genome: 82,610 in *J.*  
128 *nigra*, 76,847 in *J. hindsii*, 114,573 in *J. microcarpa*, 83,457 in *J. sigillata*, 97,312 in *J.*  
129 *cathayensis*, 84,098 in *J. regia*, and 123,420 in *P. stenoptera* (Table S2).

130

#### 131 *Functional Annotation Filtering of Gene Models*

132 Functional annotation via sequence similarity search (SSS) and gene family assignment  
133 (GFA) provides a form of validation for the proposed models and assesses their  
134 completeness. The reciprocal style search required query and target sequence coverage  
135 to pass a set threshold, which helped to eliminate unlikely models and validate the final  
136 models. A total of 29,046 models with both SSS result and GFA, and 5,190 with only  
137 GFA composed the final *J. nigra* set. The same approach was used for the 29,382 models  
138 in *J. hindsii*, 43,051 in *J. microcarpa*, 27,596 in *J. sigillata*, 34,857 in *J. cathayensis*, 31,621 in *J.*  
139 *regia*, and 45,808 in *P. stenoptera* (Table 2; Table S2). Structural assessment of the genes  
140 examined splice sites, exons per gene, CDS lengths, and intron lengths (Table 2) and  
141 reported average gene/CDS lengths relative to other angiosperm species. The vast  
142 majority (> 98% in all species) of the splice sites were canonical (GT/AG). All other  
143 splice site detected were GC/AG variants.

144

#### 145 *Benchmarking Genome Annotation Completeness*

146 The embryophyta collection of 1440 single copy orthologs derived from OrthoDB can be  
147 accessed via BUSCO to estimate the completeness of a plant genome assembly,  
148 transcriptome, or set of gene models. These 1440 genes (*Embryophyta odb9*) were  
149 aligned to all Juglandaceae assemblies and final gene models (Figure 2; Table S3, Table  
150 S4). Across members of *Juglans* genus, BUSCO identified 87 to 93% of their database  
151 when evaluated against the genome (Table S5). When provided with filtered complete  
152 (full-length) gene models, BUSCO reported 77 to 86% completeness, and 78 to 89% with  
153 partial (5' or 3' complete) models (Table S4).

154

#### 155 *Orthologous Group Construction*

156 Two OrthoFinder analysis that differed in adjacent clade inclusivity were used to  
157 identify homology relationships between genes of the selected species. One run of  
158 annotated Juglandaceae (6 *Juglans*, 1 *Pterocarya*) species, and another including  
159 previously annotated genomes from across the Eurosid superorder (13 species, see  
160 Methods). OrthoFinder assigned 216,778 (92.5%) of the 234,455 total genes from the  
161 Juglandaceae set to 26,458 orthogroups (Figure 3B, File S1). The resulting orthogroups  
162 range in size from 2 to 190 genes. A total of 161 genes (0.1%) are in 56 species-specific  
163 orthogroups. Of the *Juglans* species, *J. cathayensis* had the most genes designated to  
164 species-specific orthogroups (24 genes in 8 orthogroups). Just over half, 14,429  
165 orthogroups, have gene membership from all species. A total of 661 orthogroups (5268  
166 genes) are represented by all *Juglans* species (excluding *Pterocarya*). The Juglandaceae  
167 set included 538 orthogroups (1159 genes) specific to *Juglans* sect. *Dioscaryon* and 437  
168 orthogroups (1608 genes) specific to members of *Juglans* sect. *Rhysocaryon*. Within  
169 *Rhysocaryon*, 905 genes formed 389 orthogroups specific to the parapatric species, *J.*  
170 *microcarpa* and *J. nigra*, but not found in the geographically isolated *J. hindsii*. A total of  
171 149 orthogroups (564 genes) were specific to the three Eurasian *Juglans* species (*J. regia*,  
172 *J. sigillata* and *J. cathayensis*). Genes that could not be assigned to orthogroups, included:  
173 2025 (6.6%) in *J. regia*, 2801 (8.2%) in *J. cathayensis*, 1138 (4.0%) in *J. hindsii*, 3181 (7.6%) in  
174 *J. microcarpa*, 934 (3.3%) in *J. nigra*, 1251 (4.7%) in *J. sigillata*, and 6347 (14.3%) in *P.*  
175 *stenoptera* (Figure 3A; Figure 3B; File S1).

176

177 OrthoFinder analysis of selected Eurosid species assigned 401,186 (92.8%) of the  
178 456,424 total genes to 22,189 orthogroups (File S2). Of these, a total of 3054 genes (0.7%)  
179 are present in 488 species-specific orthogroups and 6722 orthogroups contained at least  
180 one gene from each species. The addition of peripheral species to the analysis resulted  
181 in an increased gene contribution per species in the orthogroups. This trend is reflected  
182 by fewer orthogroups resulting from the Eurosid clustering and the approximate

183 halving of the number of unassigned *Juglans* genes in the Eurosid clustering when  
184 compared to the Juglandaceae clustering (Table S6).

185

#### 186 *Analysis of Gene Family Evolution*

187 An evaluation of gene families among the annotated species was successful in detecting  
188 significant changes between taxa. Prior to gene family analysis with CAFE, orthogroups  
189 were filtered to exclude large families (> 100 gene copies) and those composed entirely  
190 of paralogs. This removed 57 of 26,458 (0.2%) orthogroups from the Juglandaceae set,  
191 and 1880 of 22,189 (8.5%) orthogroups from the Eurosid set. Calculated lambda values  
192 were 0.02396 and 0.02197 for Juglandaceae and Eurosid sets, respectively. The higher  
193 lambda of Juglandaceae set indicates a higher calculated average rate of gene family  
194 evolution. Of the 460 significant rapidly evolving orthogroups discovered based on the  
195 Eurosid set, 153 (+131 families expanded/-22 families contracted) had significant  
196 changes in *J. microcarpa*, 102 (+57/-45) in *J. regia*, 86 (+62/-24) in *J. cathayensis*, 76 (+30/-46)  
197 in *J. sigillata*, 61 (+22/-39) in *J. nigra*, 58 (+32/-26) in *J. hindsii*, and 139 (+113/-24) in *P.*  
198 *stenoptera* (Figure 5, File S4). The Juglandaceae set revealed 430 significant rapidly  
199 evolving gene families of which 168 (+123/-45) had significant size changes in the *J.*  
200 *microcarpa* terminal branch, 141 (+86/-55) in *J. regia*, 92 (+72/-20) in *J. cathayensis*, 98 (+39/-  
201 59) in *J. sigillata*, 101 (+32/-69) in *J. nigra*, 77 (+40/-37) in *J. hindsii*, and 98 (+67/-31) in *P.*  
202 *stenoptera* (File S3).

203

#### 204 *Rhysocaryon Gene Family Evolution*

205 At the ancestral *Rhysocaryon* node, 4 significant expansions and 2 significant  
206 contractions were discovered. Functional annotation of Juglandaceae orthogroups  
207 expanded in *J. microcarpa* revealed high incidence of transferase activity (GO:0016740)  
208 which occurred in 8 of 123 orthogroup annotations. An orthogroup annotated as  
209 ankyrin repeat-containing (OG0000093) was significantly expanded in both *J. microcarpa*  
210 (22 genes) and *J. sigillata* (16 genes) relative to other species (0-6 genes). Three  
211 orthogroups annotated as Kinesin-like protein KIN-4C, Phosphatidylinositol 4-kinase  
212 gamma 7 (P4KG7) and RNA-dependent RNA polymerase (OG0002363, OG0001584 and  
213 OG0013906) were expanded in *J. microcarpa* and *J. nigra* relative to other annotated  
214 species. An activating signal cointegrator orthogroup (OG0022144) with a zinc finger-  
215 C2HC5 (Pfam:PF06221) domain was expanded (+13) in *J. microcarpa*. OG0000386,  
216 annotated as topless-related protein 1 (TPR1) was also expanded (+6). Three  
217 orthogroups annotated as “wall-associated receptor kinase-like” (OG0000502,  
218 OG0000046 and OG0000685) lacked gene models from both *J. hindsii* and *J. microcarpa*.  
219 OG0000685 also lacked *J. sigillata* gene models. A Heat Shock Cognate 70 kDa (HSC70)  
220 orthogroup (OG0000060) was expanded in both *J. hindsii* (23 genes) and *J. microcarpa* (30  
221 genes) relative to all species outside of *Rhysocaryon* (1-2 genes) and unexpectedly lacked  
222 gene models from *J. nigra*. Similarly, SAPK10-like serine/threonine kinase orthogroup

223 (OG0001146) was also expanded in both *J. hindsii* (8 genes) and *J. microcarpa* (7 genes)  
224 relative to other species (0-4 genes) and lacked *J. nigra* gene models.

225  
226 The large Juglandaceae callose synthase 3-like orthogroup (OG0000004) is absent in *J.*  
227 *nigra* and highly contracted in *J. microcarpa* and *J. cathayensis* (7 genes) relative to other  
228 species (32-36 genes). Four cyclic nucleotide-gated ion channel orthogroups involved in  
229 Plant-pathogen interaction (KEGG:04626), are lost or highly contracted in *J. nigra*:  
230 OG0000038 (-7), OG0000567 (-3), OG0000177 (-4), OG0000603 (-2). Juglandaceae  
231 REDUCED WALL ACETYLATION 2 (RWA2) (OG0000145), putative disease resistance  
232 protein (OG0000022) and receptor-like protein kinase FERONIA-like (OG0000471)  
233 orthogroups lacked *J. hindsii* gene models despite being represented by every other  
234 species.

235

### 236 *Dioscaryon* Gene Family Evolution

237 At the ancestral *Dioscaryon* node, 5 significant expansions and 8 significant contractions  
238 were discovered. Annotated gene family expansions specific to *Dioscaryon* include (+3)  
239 ABC transporter B family orthogroup (OG0000286), and (+2) Ethanolamine-phosphate  
240 (OG0001347) orthogroups. Juglandaceae cationic peroxidase (CEVI16) orthogroup  
241 (OG0000173) related to Phenylpropanoid biosynthesis (GO:0009699) is contracted in  
242 *Juglans* sect. *Dioscaryon*. Probable reticuline oxidase families (OG0000562, OG0000531)  
243 annotated as containing BBE (Pfam:PF08031) and FAD binding 4 (Pfam:PF1565) lack  
244 *Dioscaryon* gene models while all non-*Dioscaryon* species contribute at least 3 gene  
245 copies in each orthogroup. *Dioscaryon* gene models were absent in nodulin-like  
246 orthogroup (OG0000206) (-3 genes). Contractions in F-box protein orthoroupe  
247 (OG0000054) and Oxygen-evolving enhancer protein 2 (OG0000122) were also observed  
248 (-4 and -3 genes, respectively). One SWIM zinc finger orthogroup (OG0000510) lacked  
249 gene models in *J. regia*, *J. sigillata* and *J. microcarpa*. Another orthogroup (OG0000266)  
250 annotated as SWIM zinc finger appeared to also be absent in *J. regia*, *J. sigillata* and *J.*  
251 *microcarpa*, but a *J. sigillata* ortholog was discovered as a loss through the absence of  
252 protein to genome alignment.

253

254 Gene family expansions in *J. regia* include (+4) 26s proteasome regulatory subunit  
255 (OG0019963), (+3) thaumatin-like protein (OG0000263), (+4) STOMATAL  
256 CYTOKINESIS DEFECTIVE 1-like (OG0001205), (+3) mitogen-activated protein kinase  
257 kinase kinase (OG0012715), (+4) Hydroxyproline O-galactosyltransferase GALT6  
258 (OG0004422), (+10) tubulin beta-6 chain (OG0000238). Expanded orthogroups in *J.*  
259 *sigillata* include (+11) endoribonuclease dicer (OG0000131).

260

### 261 *Gene Family Evolution Enrichment*

262 EggNOG gene descriptions of rapidly evolving gene families were examined to infer

263 the major functional categories of rapidly expanding and contracting gene families  
264 across Juglandaceae. Of the 333 instances of gene family contraction calculated across  
265 the Juglandaceae, the most frequent GO molecular function terms, included: 26  
266 transferase activity (GO:0016740), 9 lyase activity (GO:0016829), and 9 cyclase activity  
267 (GO:0009975) families. High occurrence EggNOG-derived gene family descriptions of  
268 contracting orthogroups included 25 that contained “resistance”, 54 containing  
269 “kinase”, 8 “cytochrome P450” and 7 “channel”. For the 428 instances of gene family  
270 expansion, the most frequent molecular function annotations were 29 transferase  
271 activity (GO:0016740), 8 transmembrane transporter activity (GO:0022857) and 7  
272 heterocyclic compound binding (GO:1901363). High occurrence EggNOG descriptions  
273 of expanding orthogroups include 51 containing “kinase”, 19 that contained  
274 “resistance” 17 that contained “synthase”. Comparisons of annotated rapidly evolving  
275 gene families among Juglandaceae species did reveal disproportionate gains and losses.  
276 *J. microcarpa*, for example has 7 instances of expansion in “synthase” orthogroups while  
277 *J. sigillata* has 0 and *J. hindsii* demonstrates contraction of 10 “kinase” orthogroups,  
278 while only 2 such contractions were calculated in *J. cathayensis* (0 at the preceding node  
279 shared with *Dioscaryon*). These divergent patterns of gene family evolution underline  
280 the importance of having comprehensive genetic resources for multiple species within a  
281 single clade. The six *Juglans* genome annotations provide an immediate reference for  
282 one another and construct a genetic background for the genus.

283  
284 Of the 153 significant gene family size changes in *J. microcarpa*, 131 represent  
285 expansions. The changes in other *Juglans* species are more evenly distributed between  
286 expansions and contractions. The inflated number of significant expansions in *J.*  
287 *microcarpa* likely reflects uncollapsed heterozygosity left behind by the genome  
288 assembly process, especially given the unexpectedly large size of the *J. microcarpa*  
289 assembly (Table 1). A similar, but less pronounced pattern is observed in *J. cathayensis*.

#### 290 *Selection Analysis*

291 The likelihoods of one-ratio (null), nearly neutral (NN) and positive selection (PS)  
292 models were compared (Table S7). Of the 15 gene families that were tested, the nearly  
293 neutral model fit the data significantly better than the null for 2 orthogroups and the  
294 positive selection model for 10. Of these, 6 orthogroups (OG0000038, OG0000567,  
295 OG0000603, OG0001146, OG0001205, OG0001222) were found to be under positive  
296 selection across the selected sequences. OG0000038 (PS  $\omega = 1.67$ ), OG0000567 (PS  $\omega =$   
297 1.76) and OG0000603 (PS  $\omega = 1.84$ ) were annotated as cyclic nucleotide-gated ion channel  
298 proteins, OG0001146 (PS  $\omega = 1.24$ ) as a serine threonine-protein kinase, OG0001205 (PS  
299  $\omega = 9.96$ ) annotated as STOMATAL CYTOKINESIS DEFECTIVE 1-like and OG0001222  
300 (PS  $\omega = 2.42$ ) as Chitinase-3.

301

#### 302 *Divergence Estimates*



303 We estimated the distribution of nucleotide substitution rates at silent codon positions  
304 between each of the *Juglans* genomes studied and the outgroup *Pterocarya stenoptera*. For  
305 each pairwise analysis, we observed similar bimodal distributions of synonymous  
306 substitution rates ( $K_s$ ) between syntenic blocks of genes (Figure 4A). For these syntenic  
307 blocks of genes, a whole genome duplication event would give rise to such a bimodal  
308 distribution in time to the most recent common ancestor. For each species pair, we thus  
309 estimated the two modes of the distribution (Table S8). The estimates for the higher  
310 mode ranged from a low of  $K_s = 0.356$  to a high of  $K_s = 0.364$  with an average value of  
311  $K_s = 0.361$ . The lower mode ranged from a low of  $K_s = 0.050$  to a high of  $K_s = 0.054$  with  
312 an average value of  $K_s = 0.053$ . While the non-synonymous substitution rates ( $K_n$ )  
313 between syntenic blocks of genes were much lower, the distributions were also bi-  
314 modal in appearance (Figure 4B)

315  
316 The annotation of the genome of *Quercus robur* (oakgenome.fr) allowed us to perform  
317 the same analysis with a species whose common ancestor predates the whole genome  
318 duplication event common to the Juglandaceae. We chose the genomes of *J. regia* and *P.*  
319 *stenoptera* as the best representatives of their genera. In both cases, while the histogram  
320 was much sparser due to the additional divergence, a single prominent peak was  
321 observed. For *J. regia* against *Q. robur*, it was observed at a value of  $K_s = 0.49$  and for *P.*  
322 *stenoptera* against *Q. robur*, it was observed at a value of  $K_s = 0.53$ . These divergence  
323 estimates are greater than all values estimated in the *Juglans-Pterocarya* comparisons.

## 324 325 **DISCUSSION**

326 In this study, we utilized a comprehensive *J. regia* transcriptome dataset to produce  
327 high-quality genome annotations of six recently assembled species within *Juglans* and a  
328 single member of the sister genus, *Pterocarya*. The gene model set completeness as  
329 measured by BUSCO suggests our annotation pipeline is suitable for comprehensive  
330 capture of protein-coding genes. It is still expected that limitations of single species  
331 RNA-Seq as the training input introduced some bias in the annotations for the other  
332 Juglandaceae. Although the gene prediction software, BRAKER2 seems to return far  
333 fewer false positive gene models than alternative applications, the process of removing  
334 the extraneous models remains essential to producing genome annotations that can be  
335 leveraged by the community. Still, complex plant genomes, especially those derived  
336 from short read dominant assemblies, remain challenging to annotate and existing  
337 pipelines typically introduce errors and false positives (Van Bel et al. 2019). The gene  
338 model filtration steps presented here handled multi-exonic and mono-exonic genes  
339 separately and examined both structural and functional qualities of models to permit  
340 only those of the highest confidence. This phylogenetically comprehensive set of  
341 diploid genome annotations represents an invaluable resource for comparative  
342 genomics studies within *Juglans* and for other clades (Tuskan et al. 2018).

343  
344 The species annotated in this study represent each of the three sections of *Juglans*  
345 (*Cardiocaryon*, *Juglans* (syn. *Dioscaryon*) and *Rhysocaryon*) and represent fully the  
346 diversity in the genus. These annotations will serve as a platform for identifying genetic  
347 underpinnings of high-value agricultural characteristics such as drought tolerance and  
348 disease resistance that are scattered across the various species (Bernard *et al.* 2018).  
349 Moreover, they have the potential to add a new dimension to the ongoing medicinal  
350 natural products search within *Juglans* (Yao *et al.* 2012; Xu *et al.* 2013; Kim *et al.* 2018).

351  
352 Because this dataset is representative of the diversity in *Juglans*, it allows for exceptional  
353 resolution of patterns in gene family evolution. Multiple samples within sect.  
354 *Rhysocaryon* and sect. *Dioscaryon* increase confidence that observed patterns across those  
355 genomes are true and not artifacts of technological and biological challenges.

356  
357 *Challenges in Assessing Gene Family Evolution*  
358 Given the nature of short read assemblies, the possibility of an assembly or annotation  
359 error resulting in an incorrect consensus and falsely 'pseudogenizing' a gene model is  
360 non-zero. These errors, especially in small gene families, could be interpreted as  
361 significant contractions in the CAFE analysis. The weighty consequence of this effect on  
362 interpreting gene family evolution underscores the importance of deep sequencing for  
363 comparative studies, and as the shift towards long read sequencing progresses,  
364 adherence to best base-calling and polishing practices.

365  
366 The risk of introducing false positive expansions is most prominent in the genome  
367 assembly phase. High heterozygosity in parts of a genome make the recovery of both  
368 haplotypes (for diploids) difficult for those regions. In final assemblies the haplotypes  
369 are often reported in separate contigs. Any gene models prevailing in these regions will  
370 falsely occur in duplicate within the annotation if the haplotigs are not recognized. The  
371 *J. microcarpa*, *P. stenoptera*, and to a lesser extent, *J. cathayensis* genomes exhibited these  
372 patterns by showing high duplication rates in BUSCO analyses (Table S4), inflated  
373 numbers of gene models (Table S2), and larger than expected genome sizes (Table 1).  
374 The evidence for uncollapsed heterozygosity in these genomes was reinforced by the  
375 absence of an additional peak representing taxa-specific duplications in the Ks  
376 distributions. Computational tools have been developed to address the challenges of  
377 resolving heterozygous region but are most effective when applied to long-read (or  
378 hybrid) assemblies (Chin *et al.* 2016).

379  
380 The vastly reduced cost of sequencing over the past several years has enabled genus-  
381 level analysis of whole genome diversity, a scale at which it becomes tractable to assess  
382 patterns and significance of changes in gene CNV and other structural variation. Given

383 the newness of this capability, a sharp increase in sequencing projects capable of  
384 resolving CNV should be expected. However, there are still only a few studies that have  
385 established the phenotypic and fitness consequences of CNV (Cook *et al.* 2012,  
386 Würschum *et al.* 2018) and even fewer that involve full-genome assessments (Prunier *et*  
387 *al.* 2018).

388  
389 Convergent shifts in copy number under strong selective pressure for glyphosate  
390 resistance were reported for the *EPSPS* gene in eight weedy species (Patterson *et al.*  
391 2018). This finding is notable because it points towards modulated gene expression  
392 levels through CNV as a potential source of rapid adaptation on short timescales. These  
393 types of structural variations most often occur in genomic regions called CNV hotspots,  
394 which are enriched for low-copy repeats (LCRs) (Hastings *et al.* 2009). In a genome-wide  
395 survey, distinguishing between an ancestral event and parallel evolution would require  
396 attention to the entire duplicated genomic region in each taxon. These investigations  
397 lend a greater importance to the production of near chromosome-level assemblies  
398 because poor contiguity obscures the ability to resolve structural variants.

399  
400 A recent pangenome study in *Poplar* showed that intraspecific CNV occurred across  
401 each of the three genomes sequenced from hybridizable species (Pinosio *et al.* 2016).  
402 This and similar studies suggest that a single genome assembly from a single locality is  
403 likely not representative of the copy number diversity that exists within the sampled  
404 population (Hirsch *et al.* 2014; Golicz *et al.* 2016; Gordon *et al.* 2017; Zhao *et al.* 2018).

405  
406 By this notion, the following observations are in no way confirmatory without  
407 additional sources of evidence. Although this dataset does not resolve interspecific  
408 diversity, it is still representative of the diversity in *Juglans*, and allows for exceptional  
409 resolution of patterns in gene family evolution. Multiple samples within sect.  
410 *Rhysocaryon* and sect. *Dioscaryon*, and careful attention to informatic strategies, increases  
411 confidence that the observed patterns across these genomes are true and not artifacts.

412  
413 *Disease Resistance*

414  
415 *Losses in Dioscaryon*

416 The absence of *Dioscaryon* gene models in the reticuline oxidase (berberine bridge  
417 enzyme, BBE) annotated orthogroups shows a contraction before their divergence 22  
418 MYA (Stevens *et al.* 2018). Enzymes in this family have been shown to contribute to  
419 alkaloid production (Fujii *et al.* 2007) in California poppy (*Eschscholzia californica*) and  
420 have been implicated in monolignol metabolism. Extreme (400-fold) upregulation of  
421 enzymes in this family has been observed during pathogen attack and osmotic stress in  
422 *Arabidopsis* (Daniel *et al.* 2015). Recent work in *Arabidopsis* demonstrated the function of

423 one BBE-like enzyme in oxidizing oligogalacturonides (OGs) and thereby diminishing  
424 their elicitor activity (Benedetti *et al.* 2018). It is likely that the loss of the BBE gene  
425 family in *J. regia* and *J. sigillata* occurred in the *Dioscaryon* ancestor but that does not  
426 eliminate the possibility that these species were favored and therefore selected for their  
427 potentially tamed secondary metabolite profiles. Until recently, chemical analyses in  
428 *Juglans* have been limited to observational studies and comparisons of different  
429 cultivars within a species (Vu *et al.* 2018; Vu *et al.* 2019). Additional studies contrasting  
430 metabolomic profiles of domesticated species with their wild relatives will offer  
431 valuable insight into tree domestication, especially when paired with genome  
432 annotations.

433  
434 The wall-associated kinases (WAKs) are a family of transmembrane receptor-like proteins  
435 that bind pectin in the extracellular matrix (ECM) (Wagner and Kohorn, 2001). They are  
436 necessary for cell expansion in Arabidopsis seedlings, but when bound to OGs also function  
437 in defense response through Enhanced disease susceptibility 1 (EDS1) and Phytoalexin  
438 deficient 4 (PAD4) dependent activation of MPK6-dependent pathway (Kohorn *et al.* 2009;  
439 Brutus *et al.* 2010; Kohorn *et al.* 2014; Davidsson *et al.* 2017). Recent studies of WAKs have  
440 shed light on their role in plant response to abiotic stressors (Marakli and Gozukirmizi.  
441 2018, Xia *et al.* 2018) but many WAK family genes remain without functional  
442 characterization. Because of this, the parallel contraction and loss of *J. hindsii* and *J. sigillata*  
443 genes from multiple WAK annotated orthogroups is difficult to speculate on. A more  
444 elaborate depiction of the WAK gene family will certainly shed light on the significance of  
445 these losses. It is interesting to note, however, that two gene families (WAK and BBE) which  
446 have members known to interact with OGs are both contracted in *J. sigillata*. These losses  
447 suggest a significant shift in *J. sigillata* effector-triggered immunity.

#### 448 449 Losses and contractions in *J. hindsii*

450 In California, the cultivation of *J. regia* is most commonly facilitated using Paradox  
451 rootstock (*J. hindsii* Ⓢ × *J. regia* Ⓢ), which is valued for its resistance to soil-borne  
452 pathogens (Browne *et al.* 2015, Potter *et al.* 2002). Despite higher resistance to several  
453 diseases, Paradox rootstock remain susceptible to *Armillaria* root rot, which is caused by  
454 a basidiomycete, *A. mellea* in California (Baumgartner *et al.* 2013). The impact of this  
455 disease is worsened by the lack of post-infection controls. Accordingly, discovering  
456 resistant Paradox hybrids has been the focus of some research, but has achieved limited  
457 success relative to the levels of *Armillaria* resistance reported in *J. hindsii* (Drakulic *et al.*  
458 2017). Full genome annotations for these *Juglans* and others might be able to impart  
459 clues about the genetic distinctions that contribute to these agriculturally interesting  
460 phenotypes.

461

462 For comparison, interactions between *Arabidopsis* and the fungal pathogen, *Fusarium*  
463 *oxysporum* are intensely studied as a model for plant fungal diseases. In this system, *F.*  
464 *oxysporum* infections are potentiated by the alkalinization of soil around host root tissue  
465 caused by plant RALF-triggered alkalinization response to pathogen secreted peptides,  
466 RALFs (Rapid Alkalinization Factors) homologs (Masachis *et al.* 2016). These fungal  
467 peptides target various members of transmembrane receptor-like kinases encoded by  
468 the plant *Catharanthus roseus* Receptor-like Kinase (CrRLK1L) gene family. There are 17  
469 reported CrRLK1L protein orthologs in *Arabidopsis* that have been implicated in a  
470 variety of processes including immunity signaling, abiotic stress response and cell wall  
471 dynamics (Kessler *et al.* 2010, Richter *et al.* 2017, Guo *et al.* 2018, Richter *et al.* 2018).  
472 Several Basidiomycete genomes have been reported to encode RALF homologs, making  
473 it plausible that *Armillaria* is among the fungi that utilize RALF-homolog effectors in  
474 infection.

475  
476 The current literature suggests a central role for CrRLK1L with respect to *F. oxysporum*  
477 resistance. It is possible that the reduction or absence of the CrRLK1L orthologs  
478 (annotated as FERONIA) in *J. hindsii* is at least partially responsible for its resistance to  
479 *A. mellea* infection. The absence of *J. hindsii* models across five orthogroups annotated as  
480 receptor-like protein kinase FERONIA-like in the Juglandaceae comparison  
481 (OG0000687, OG0000471, OG0022392, OG0009045, OG0013911) including two for which  
482 every other species is represented (OG0000687, OG0000471) warrants further  
483 investigation. If the gene family is lost in *J. hindsii*, discovering any compensatory  
484 mechanisms that might maintain the integrity of CrRLK1L-involved pathways could  
485 have application in engineering fungus-resistant plants.

486  
487 Like the observation that *Arabidopsis* FERONIA knockouts are more resistant to  
488 *Fusarium* infection (Masachis *et al.* 2016), the loss of function *Arabidopsis* mutations in  
489 RWA2 (reduced wall acetylation-2) led to increased resistance against the Ascomycete  
490 pathogen, *Botrytis cinerea*, the causal agent of grey mold (Manabe *et al.* 2011). *B. cinerea*  
491 belongs to a family of fungi, Botryosphaeriaceae, several of which are known to infect  
492 the nuts of *J. regia* and related species (Moral *et al.* 2010). The Juglandaceae RWA2  
493 orthogroup (OG0000145) was missing *J. hindsii* gene models. RWA2 is involved in  
494 secondary cell wall synthesis and is regulated by SND1 (secondary wall-associated  
495 NAC domain protein 1) (Lee *et al.* 2011). No experiments to date have assessed the  
496 susceptibility of various *Juglans* species to *B. cinerea*, but it would be interesting to  
497 examine resistance to the pathogen in a species without RWA2. The observed loss of  
498 Chitinase-3 (Cht3) (OG0001222) in *J. hindsii* is consistent with the loss of FERONIA and  
499 RWA2. Cht3 (along with glucanase and thaumatin-like protein) are aspects of plant  
500 response to fungal invasion (Singh *et al.* 2012) and was found to be under positive  
501 selection in the additional *Juglans* species (Table S7). If the loss of FERONIA and RWA2

502 do correspond to a weakened compatible host signature, the decreased incidence of  
503 fungal infection would render such defense responses inessential.

504

#### 505 *Mutation rate estimates and evidence of WGD*

506 Testing for WGD supported the hypothesis of a Juglandoid duplication. We observed  
507 similar bimodal distributions of Ks values among syntenic blocks of genes in each of the  
508 *Juglans-Pterocarya* pairwise analyses (Figure 4A). The bimodal distribution can be  
509 attributed to a mixture of estimates from two distinct lineages; comparisons between  
510 orthologous genes; and comparisons between more distant paralogous genes arising  
511 from the whole genome duplication. Bimodal distributions for all *Juglans-Pterocarya*  
512 pairwise comparisons are consistent with the WGD occurring prior to the radiation of  
513 Juglans (Luo et al. 2015; Zhu et al. 2019). As additional confirmation, the most  
514 prominent feature in the same analysis against the annotated genome of *Quercus robur*  
515 is a peak at divergence values greater than those estimated for the WGD (Table S5).

516

517 Using the larger mode for each of the five distributions, we can estimate the nucleotide  
518 substitution rate using the method of Zhu *et al.* (2019), for comparison. Using 66 MYA  
519 as the assumed date of the WGD from Zhu *et al.* (2019), we obtain a synonymous  
520 mutation rate of  $2.7 \times 10^{-9}$ . This rate is higher than the rate of  $2.3 \times 10^{-9}$  estimated using 14  
521 genes in Luo et al. (2015) and closer to the more recent estimate of  $2.5 \times 10^{-9}$  in Zhu *et al.*  
522 (2019) using thousands of genes in a *J.regia* x *J.microcarpa* hybrid. Our faster rate is still  
523 more consistent with the rates of other woody perennials (e.g. Palm (Gaut *et al.* 1996)  
524 and *P. trichocarpa* (Tuskan *et al.* 2006)), and still five times slower than the rate reported  
525 for *Arabidopsis* (Koch *et al.* 2000).

526

527 A surprising observation was the distance between the two modes. We assume that the  
528 estimated Ks of the smaller mode represents the between species divergence. The ratios  
529 of the larger to smaller modes ranged from 6.5 to 7.3. Interpretation of fossil data  
530 (Manchester 1987) placed the initial split into *Rhysocaryon* and *Cardiocaryon* around 45  
531 MYA, resolving around 38 MYA. Much closer to the assumed time of the WGD than  
532 our bimodal distributions of Ks would indicate under a molecular clock. The  
533 discrepancy in estimated WGD times may be due to the non-neutral nature of these  
534 substitutions and departure from a molecular clock. However, a relevant observation  
535 was recently made using a coalescent based approach. Bai *et al.* (2018) noted that  
536 convergence of effective population size indicates a much earlier beginning for the  
537 divergence among Juglans lineages. Our data could also be interpreted to support a  
538 more recent divergence of walnut lineages.

539

540 The resources and services provided by *Juglans* species are nutritionally and culturally  
541 significant. Their wood, used to construct furnishing and musical instruments, is valued

542 among woodworkers. Ink from walnut husks was used by Leonardo da Vinci and  
543 Rembrandt. Brown dye from walnut stained fabrics was used in classical Rome,  
544 medieval Europe, Byzantium and the Ottoman Empire. The genus is elevated in poetry  
545 across the globe, including for its non-monetary benefits in Mary Oliver's "The Black  
546 Walnut Tree" (Oliver, 1992) and nutritional properties in Tatsuji Miyoshi's "In Praise of  
547 a Walnut" (Miyoshi, 1946). We are enthusiastic to contribute to the understanding of  
548 and appreciation for this genus by constructing these genome annotation resources.

549

## 550 **METHODS**

### 551 *Repeat Library Generation and Softmasking*

552 The seven assemblies, ranging in size from 600 Mb to just under 1 Gb ( $2n=32$ ) were  
553 assessed for repeat content (Stevens *et al.* 2018). Scaffolds and contigs less than 3Kbp in  
554 length were removed from the assemblies prior to annotation. RepeatModeler (v1.0.8)  
555 was used to construct a repeat library through a combination of *de novo* and structural  
556 prediction tools wrapped into the pipeline (Smit and Hubley, 2008). RepeatModeler  
557 provided base annotations for the repeat elements (Table S1) and generated a consensus  
558 library that was used as input to Repeatmasker (v4.0.6) to generate softmasked  
559 genomes (Smit *et al.* 2013).

560

### 561 *Structural Annotation*

562 After softmasking, a set of 19 independent *J. regia* tissue-specific libraries described in  
563 Chakraborty *et al.* (2015) were aligned to the reference genomes via TopHat2 (v2.1.1)  
564 (Kim *et al.* 2013). The Illumina 85bp PE sequences were independently quality  
565 controlled for a minimum length of 45bp and a minimum Phred-scaled quality score of  
566 35 via Sickle (v. 1.33) prior to alignment. Independent alignment files were sorted and  
567 provided to Braker2 (v2.0) which generated a hints file for semi-supervised training of  
568 the *ab initio* gene prediction package, Augustus (Stanke *et al.* 2008). Braker2 utilizes  
569 RNA-Seq reads directly to inform gene prediction and deduce the final models (Hoff *et al.*  
570 *et al.* 2016). The annotation files (GFF) produced were processed by gFACs, to filter out  
571 incomplete or improbable gene models on the basis of completion (identifiable start and  
572 stop codons) and canonical gene structure (micro-exons and micro-introns < 20bp are  
573 filtered to reduce erroneous models). The gFACs package also resolves conflicting  
574 models and reports splice site statistics as well as other basic gene structure statistics  
575 (Caballero and Wegrzyn, 2019).

576

### 577 *Functional Annotation*

578 The EnTAP functional annotation package was employed to remove unlikely gene  
579 models and provide provisional functional information (Hart *et al.* 2019). Multi-exonic  
580 and mono-exonic gene models were subjected to different functional filtering pipelines  
581 that each utilized EnTAP. For multi-exonic genes, EnTAP (v 0.8.1) was provided three

582 curated databases (NCBI's Plant Protein (release 87), NCBI's RefSeq Protein (release 87),  
583 and UniProtKB/Swiss-Prot) for similarity search (50% target and query coverage;  
584 Diamond E-value .00001), followed by gene family assignment via the EggNOG  
585 database and EggNOG-mapper toolbox (Jensen *et al.* 2008). Associations to gene  
586 families provided the basis for Gene Ontology term assignment, identification of  
587 protein domains (PFAM), and associated pathways (KEGG) (Finn *et al.* 2014; Ashburner  
588 *et al.* 2017). Multi-exonics were removed from the set if they had neither sequence  
589 similarity search result nor gene family assignment. Mono-exonic genes are typically  
590 over-estimated in the process of *ab initio* genome annotation. To reduce this effect, they  
591 were aligned to a custom curated database of monoexonic genes from other plant  
592 species using 80% query coverage and 80% target coverage cutoffs in an independent  
593 similarity search through EnTAP. EggNOG and PFAM were used in mono-exonic gene  
594 model filtering as they were for multi-exonic filtering. After the first round of filters,  
595 InterProScan (v5.25) was used to confirm gene family assignment and protein domains  
596 in monoexonic gene models. Gene models without InterProScan annotations were  
597 removed from the monoexonic set. For each species, the filtered multi-exonic and  
598 mono-exonic gene sets were combined and passed back to gFACs to generate a  
599 statistical profile and consistent annotation file in gene transfer format (GTF). Finally,  
600 gene models that annotated with domains specific to retroelements were further filtered  
601 from the final annotations based upon Pfam database descriptions. The entire set of  
602 filtered gene models was evaluated for completeness. BUSCO (v3.0.2) was used with  
603 default parameters and the embryophyta reference set of 1440 orthologs for this  
604 purpose (Simão *et al.* 2015). Using the output from Augustus, we used gFACs to also  
605 capture partial gene models. These were also functionally annotated used EnTAP, and  
606 then compared using the same BUSCO analysis and ortholog set.

607

### 608 *Gene Family Classification and Evolution*

609 The proteins derived from the filtered genome annotations of each species were  
610 processed with OrthoFinder-Diamond (v1.1.10) to provide information about  
611 orthologous gene families. OrthoFinder is robust to incomplete models, differing gene  
612 lengths, and larger phylogenetic distances (Emms and Kelly, 2015). Gene families  
613 (orthogroups) in OrthoFinder are defined as homologous genes descended from a  
614 single gene from the last common ancestor of the species examined. It is assumed that a  
615 parental gene of each orthogroup was present in the common ancestor of the seven  
616 species investigated. Two independent runs were conducted with OrthoFinder: *Juglans*  
617 with the *Pterocarya* outgroup, and another that included these species with a set of 6  
618 selected Eurosids (*Citrus grandis*, *Eucalyptus grandis*, *Arabidopsis thaliana*, *Carica papaya*,  
619 *Populus trichocarpa* and *Quercus robur*). Rates of gene family evolution were calculated  
620 for each orthogroup using the stochastic birth and death rate modeling implemented in  
621 CAFE (v4.1) (De Bie *et al.* 2006). Species trees were constructed by applying estimated



622 divergence times from literature detailing rosid phylogeny to the known topology  
623 (Magallón *et al.* 2014, Dong *et al.* 2017). Large variance in gene copy number between  
624 species can lead to inaccurate calculation of birth and death rate parameters, therefore  
625 large orthogroups with more than 100 gene models were removed prior to the analyses  
626 and later analyzed separately using those parameters calculated by including only  
627 orthogroups with < 100 gene models. Orthogroups represented by a single set of  
628 paralogs were also removed because they are uninformative. Rapidly evolving gene  
629 families (orthogroups) were identified using CAFE, which models the rate of gene  
630 family evolution while accounting for the uncertainty in membership that results from  
631 imperfect genome annotation. For each set, the lambda (birth and death rate) parameter  
632 was calculated uniformly across the phylogeny. Orthogroups with a large size variance  
633 among taxa were selected using a CAFE family-wide P-values <0.05. Those orthogroups  
634 with accelerated rates of evolution were selected using branch-specific Viterbi P-values  
635 <0.05. The gene-family losses described were independently confirmed using Exonerate  
636 protein2genome alignments of the longest gene in the orthogroup to the genome of the  
637 excluded species (90% similarity and score 1000) (Slater and Birney, 2005).

638  
639 Functional enrichment of rapidly evolving gene families was assessed independently  
640 for each node and leaf of the Juglandaceae cladogram and across the entire set.  
641 EggNOG gene descriptions of the longest gene model from each orthogroup were  
642 compiled into a functional background. The gene model annotations from sets of  
643 orthogroups found to be either rapidly expanding or rapidly contracting at each leaf or  
644 node were compared to that background to estimate functional enrichment within the  
645 set.

#### 646 647 *Selection Analysis*

648 To test for positive selection in gene families of interest, the coding sequence of gene  
649 models from each orthogroup were iteratively clustered with USEARCH (v 9.0.2132) at  
650 various identities beginning at 0.95 down to a minimum of 0.7 at intervals of 0.05.  
651 Iterative clustering was terminated once a cluster with sufficient species representation  
652 (relative to the species representation of that particular orthogroup) was produced and  
653 chosen for use in selection analysis. A multiple sequence alignment of the longest gene  
654 model from each species in that cluster was produced using Clustal Omega (v 1.2.4).  
655 The multiple sequence alignments and species tree were provided to CODEML from  
656 PAML (v 4.9) to calculate  $\omega$  (dN/dS), the ratio of non-synonymous to synonymous  
657 amino acid substitutions, across two models of adaptive evolution, including nearly  
658 neutral and positive selection and the corresponding likelihood values. A likelihood  
659 ratio test was used to determine the best model for each orthogroup.

#### 660 661 *Syntelog Analysis*

662 Genome alignment and analysis of syntenic genes was performed for each *Juglans*  
663 genome against *Pterocarya stenoptera* using a CoGE (Lyons and Freeling, 2008)  
664 SynMAP2 analysis. Genome alignment was performed using Last. Five genes were  
665 used as the minimum number of aligned pairs for DAGchainer (Haas *et al.* 2004).  
666 Synonymous (Ks) and non-synonymous (Kn) coding sequence divergence was  
667 estimated for syntenic protein coding gene pairs with CodeML (Yang, 2007).  
668

669 **Data Availability:** The genomic resources described here are available at NCBI under  
670 BioProject PRJNA445704 and the transcriptomic resources under BioProject  
671 PRJNA232394. These resources are also accessible from [hardwoodgenomics.org](http://hardwoodgenomics.org) and  
672 [treegenesdb.org](http://treegenesdb.org). Functional annotations, gene models and gene transfer format (gtf)  
673 files are also available on [treegenesdb.org](http://treegenesdb.org). Scripts and detailed processes used for this  
674 study are accessible on [https://gitlab.com/tree-genome-annotation/Walnut\\_Annotation](https://gitlab.com/tree-genome-annotation/Walnut_Annotation).  
675

676 **Acknowledgements:** This project was supported by the California Walnut Board,  
677 USDA NIFA SCRI-Award no. 2012-51181-20027 and USDA ARS CRIS project no. 5306-  
678 22000-015-00D. We thank the Institute for Systems Genomics Computational Biology  
679 Core for access to software and hardware support and Dr. Uzay Sezen at the University  
680 of Connecticut for providing enthusiasm and suggested revisions. The authors declare  
681 no conflict of interest.  
682

683 **Author Contributions:** DBN, CHL, AD and KAS envisioned the resource and generated  
684 the sequence data. JLW, KAS, SZ, AJT and TF outlined the comparative methodology.  
685 AJT, TF, SZ, MC and KAS analyzed the data. AJT, TF and JLW wrote the paper.

- 686 **Ashburner, M., Ball, C.A., Blake, J.A., et al.** (2000) Gene ontology: tool for the  
687 unification of biology. The Gene Ontology Consortium. *Nat. Genet.*, **25**, 25–29.
- 688 **Bai, W.-N., Yan, P.-C., Zhang, B.-W., Woeste, K.E., Lin, K. and Zhang, D.-Y.** (2018)  
689 Demographically idiosyncratic responses to climate change and rapid Pleistocene  
690 diversification of the walnut genus *Juglans* (Juglandaceae) revealed by whole-genome  
691 sequences. *New Phytologist*, **217**, 1726–1736.
- 692 **Baumgartner, K., Fujiyoshi, P., Browne, G.T., Leslie, C. and Kluepfel, D.A.** (2013)  
693 Evaluating Paradox Walnut Rootstocks for Resistance to Armillaria Root Disease.  
694 *HortScience*, **48**, 68–72.
- 695 **Beineke, W.F.** (1983) The Genetic Improvement of Black Walnut for Timber Production.  
696 In J. Janick, ed. *Plant Breeding Reviews: Volume 1*. Boston, MA: Springer US, pp. 236–266.
- 697 **Benedetti, M., Verrascina, I., Pontiggia, D., Locci, F., Mattei, B., Lorenzo, G.D. and**  
698 **Cervone, F.** (2018) Four Arabidopsis berberine bridge enzyme-like proteins are specific  
699 oxidases that inactivate the elicitor-active oligogalacturonides. *The Plant Journal*, **94**, 260–  
700 273.
- 701 **Bernard, A., Lheureux, F. and Dirlewanger, E.** (2017) Walnut: past and future of genetic  
702 improvement. *Tree Genetics & Genomes*, **14**, 1.
- 703 **Browne, G.T., Grant, J.A., Schmidt, L.S., Leslie, C.A. and McGranahan, G.H.** (2011)  
704 Resistance to Phytophthora and Graft Compatibility with Persian Walnut among  
705 Selections of Chinese Wingnut. *HortScience*, **46**, 371–376.
- 706 **Browne, G.T., Leslie, C.A., Grant, J.A., Bhat, R.G., Schmidt, L.S., Hackett, W.P.,**  
707 **Kluepfel, D.A., Robinson, R. and McGranahan, G.H.** (2015) Resistance to Species of  
708 Phytophthora Identified among Clones of *Juglans microcarpa* × *J. regia*. *HortScience*, **50**,  
709 1136–1142.
- 710 **Brutus, A., Sicilia, F., Macone, A., Cervone, F. and Lorenzo, G.D.** (2010) A domain  
711 swap approach reveals a role of the plant wall-associated kinase 1 (WAK1) as a receptor  
712 of oligogalacturonides. *PNAS*, **107**, 9452–9457.

- 713 **Buzo, T., McKenna, J., Kaku, S., Anwar, S.A. and McKenry, M.V.** (2009) VX211, A  
714 Vigorous New Walnut Hybrid Clone with Nematode Tolerance and a Useful Resistance  
715 Mechanism. *J Nematol*, **41**, 211–216.
- 716 **Caballero, M. and Wegrzyn, J.** (2019) gFACs: Gene Filtering, Analysis, and Conversion  
717 to Unify Genome Annotations Across Alignment and Gene Prediction Frameworks.  
718 *Genomics, Proteomics & Bioinformatics*.
- 719 **Callard, D., Axelos, M. and Mazzolini, L.** (1996) Novel Molecular Markers for Late  
720 Phases of the Growth Cycle of *Arabidopsis thaliana* Cell-Suspension Cultures Are  
721 Expressed during Organ Senescence. *Plant Physiology*, **112**, 705–715.
- 722 **Chakraborty, S., Britton, M., Martínez-García, P.J. and Dandekar, A.M.** (2016) Deep  
723 RNA-Seq profile reveals biodiversity, plant–microbe interactions and a large family of  
724 NBS-LRR resistance genes in walnut (*Juglans regia*) tissues. *AMB Express*, **6**, 12.
- 725 **Chakraborty, S., Britton, M., Wegrzyn, J., et al.** (2015) YeATS - a tool suite for  
726 analyzing RNA-seq derived transcriptome identifies a highly transcribed putative  
727 extensin in heartwood/sapwood transition zone in black walnut. *F1000Res*, **4**.
- 728 **Charrier, G., Bonhomme, M., Lacoïnte, A. and Améglio, T.** (2011) Are budburst dates,  
729 dormancy and cold acclimation in walnut trees (*Juglans regia* L.) under mainly  
730 genotypic or environmental control? *Int J Biometeorol*, **55**, 763–774.
- 731 **Chen, J., Mao, L., Lu, W., Ying, T. and Luo, Z.** (2016) Transcriptome profiling of  
732 postharvest strawberry fruit in response to exogenous auxin and abscisic acid. *Planta*,  
733 **243**, 183–197.
- 734 **Cheng, C.-Y., Krishnakumar, V., Chan, A.P., Thibaud-Nissen, F., Schobel, S. and**  
735 **Town, C.D.** (2017) Araport11: a complete reannotation of the *Arabidopsis thaliana*  
736 reference genome. *Plant J.*, **89**, 789–804.
- 737 **Chin, C.-S., Peluso, P., Sedlazeck, F.J., et al.** (2016) Phased diploid genome assembly  
738 with single-molecule real-time sequencing. *Nature Methods*, **13**, 1050–1054.
- 739 **Cook, D.E., Lee, T.G., Guo, X., et al.** (2012) Copy Number Variation of Multiple Genes  
740 at *Rhg1* Mediates Nematode Resistance in Soybean. *Science*, **338**, 1206–1209.

- 741 **Cui, B., Pan, Q., Clarke, D., Villarreal, M.O., Umbreen, S., Yuan, B., Shan, W., Jiang, J.**  
742 **and Loake, G.J.** (2018) S-nitrosylation of the zinc finger protein SRG1 regulates plant  
743 immunity. *Nature Communications*, **9**, 4226.
- 744 **Daniel, B., Pavkov-Keller, T., Steiner, B., et al.** (2015) Oxidation of Monolignols by  
745 Members of the Berberine Bridge Enzyme Family Suggests a Role in Plant Cell Wall  
746 Metabolism. *J. Biol. Chem.*, **290**, 18770–18781.
- 747 **Davidsson, P., Broberg, M., Kariola, T., Sipari, N., Pirhonen, M. and Palva, E.T.** (2017)  
748 Short oligogalacturonides induce pathogen resistance-associated gene expression in  
749 *Arabidopsis thaliana*. *BMC Plant Biol*, **17**.
- 750 **De Bie, T., Cristianini, N., Demuth, J.P. and Hahn, M.W.** (2006) CAFE: a  
751 computational tool for the study of gene family evolution. *Bioinformatics*, **22**, 1269–1271.
- 752 **Denton, J.F., Lugo-Martinez, J., Tucker, A.E., Schridder, D.R., Warren, W.C. and Hahn,**  
753 **M.W.** (2014) Extensive Error in the Number of Genes Inferred from Draft Genome  
754 Assemblies. *PLOS Computational Biology*, **10**, e1003998.
- 755 **Dong, W., Xu, C., Li, W., Xie, X., Lu, Y., Liu, Y., Jin, X. and Suo, Z.** (2017) Phylogenetic  
756 Resolution in *Juglans* Based on Complete Chloroplast Genomes and Nuclear DNA  
757 Sequences. *Front. Plant Sci.*, **8**.
- 758 **Drakulic, J., Gorton, C., Perez-Sierra, A., Clover, G. and Beal, L.** (2017) Associations  
759 Between *Armillaria* Species and Host Plants in U.K. Gardens. *Plant Disease*, **101**, 1903–  
760 1909.
- 761 **Eckert, A.J., Maloney, P.E., Vogler, D.R., Jensen, C.E., Mix, A.D. and Neale, D.B.**  
762 (2015) Local adaptation at fine spatial scales: an example from sugar pine (*Pinus*  
763 *lambertiana*, Pinaceae). *Tree Genetics & Genomes*, **11**, 42.
- 764 **Emms, D.M. and Kelly, S.** (2015) OrthoFinder: solving fundamental biases in whole  
765 genome comparisons dramatically improves orthogroup inference accuracy. *Genome*  
766 *Biology*, **16**, 157.
- 767 **Famula, R.A., Richards, J.H., Famula, T.R. and Neale, D.B.** (2018) Association genetics  
768 of carbon isotope discrimination and leaf morphology in a breeding population of  
769 *Juglans regia* L. *Tree Genetics & Genomes*, **15**, 6.

- 770 **Finn, R.D., Bateman, A., Clements, J., et al.** (2014) Pfam: the protein families database.  
771 *Nucleic Acids Res*, **42**, D222–D230.
- 772 **Fujii, N., Inui, T., Iwasa, K., Morishige, T. and Sato, F.** (2007) Knockdown of berberine  
773 bridge enzyme by RNAi accumulates (S)-reticuline and activates a silent pathway in  
774 cultured California poppy cells. *Transgenic Res*, **16**, 363–375.
- 775 **Gaut, B.S., Morton, B.R., McCaig, B.C. and Clegg, M.T.** (1996) Substitution rate  
776 comparisons between grasses and palms: synonymous rate differences at the nuclear  
777 gene *Adh* parallel rate differences at the plastid gene *rbcL*. *PNAS*, **93**, 10274–10279.
- 778 **Golicz, A.A., Bayer, P.E., Barker, G.C., et al.** (2016) The pangenome of an  
779 agronomically important crop plant *Brassica oleracea*. *Nature Communications*, **7**, 13390.
- 780 **Gordon, S.P., Contreras-Moreira, B., Woods, D.P., et al.** (2017) Extensive gene content  
781 variation in the *Brachypodium distachyon* pan-genome correlates with population  
782 structure. *Nat Commun*, **8**, 1–13.
- 783 **Gunn, B.F., Aradhya, M., Salick, J.M., Miller, A.J., Yongping, Y., Lin, L. and Xian, H.**  
784 (2010) Genetic variation in walnuts (*Juglans regia* and *J. sigillata*®; Juglandaceae): Species  
785 distinctions, human impacts, and the conservation of agrobiodiversity in Yunnan,  
786 China. *American Journal of Botany*, **97**, 660–671.
- 787 **Guo, H., Nolan, T.M., Song, G., Liu, S., Xie, Z., Chen, J., Schnable, P.S., Walley, J.W.**  
788 **and Yin, Y.** (2018) FERONIA Receptor Kinase Contributes to Plant Immunity by  
789 Suppressing Jasmonic Acid Signaling in *Arabidopsis thaliana*. *Current Biology*, **28**, 3316-  
790 3324.e6.
- 791 **Haas, B.J., Delcher, A.L., Wortman, J.R. and Salzberg, S.L.** (2004) DAGchainer: a tool  
792 for mining segmental genome duplications and synteny. *Bioinformatics*, **20**, 3643–3646.
- 793 **Hart, A.J., Ginzburg, S., Xu, M. (Sam), Fisher, C.R., Rahmatpour, N., Mitton, J.B.,**  
794 **Paul, R. and Wegrzyn, J.L.** (2019) EnTAP: Bringing Faster and Smarter Functional  
795 Annotation to Non-Model Eukaryotic Transcriptomes. *BioRxiv*, 307868.
- 796 **Hastings, P., Lupski, J.R., Rosenberg, S.M. and Ira, G.** (2009) Mechanisms of change in  
797 gene copy number. *Nat Rev Genet*, **10**, 551–564.

- 798 **Hirsch, C.N., Foerster, J.M., Johnson, J.M., et al.** (2014) Insights into the Maize Pan-  
799 Genome and Pan-Transcriptome. *The Plant Cell*, **26**, 121–135.
- 800 **Hoff, K.J., Lange, S., Lomsadze, A., Borodovsky, M. and Stanke, M.** (2016) BRAKER1:  
801 Unsupervised RNA-Seq-Based Genome Annotation with GeneMark-ET and  
802 AUGUSTUS. *Bioinformatics*, **32**, 767–769.
- 803 **Jensen, L.J., Julien, P., Kuhn, M., Mering, C. von, Muller, J., Doerks, T. and Bork, P.**  
804 (2008) eggNOG: automated construction and annotation of orthologous groups of  
805 genes. *Nucleic Acids Res*, **36**, D250–D254.
- 806 **Kessler, S.A., Shimosato-Asano, H., Keinath, N.F., Wuest, S.E., Ingram, G., Panstruga,**  
807 **R. and Grossniklaus, U.** (2010) Conserved Molecular Components for Pollen Tube  
808 Reception and Fungal Invasion. *Science*, **330**, 968–971.
- 809 **Kim, D., Pertea, G., Trapnell, C., Pimentel, H., Kelley, R. and Salzberg, S.L.** (2013)  
810 TopHat2: accurate alignment of transcriptomes in the presence of insertions, deletions  
811 and gene fusions. *Genome Biol.*, **14**, R36.
- 812 **Kim, S.-H., Lee, K.-S., Son, J.-K., Je, G.-H., Lee, J.-S., Lee, C.-H. and Cheong, C.-J.**  
813 (1998) Cytotoxic Compounds from the Roots of *Juglans mandshurica*. *J. Nat. Prod.*, **61**,  
814 643–645.
- 815 **Koch, M.A., Haubold, B. and Mitchell-Olds, T.** (2000) Comparative Evolutionary  
816 Analysis of Chalcone Synthase and Alcohol Dehydrogenase Loci in Arabidopsis,  
817 Arabis, and Related Genera (Brassicaceae). *Mol Biol Evol*, **17**, 1483–1498.
- 818 **Koh, S.-J., Choi, Y.-I., Kim, Y., Kim, Y.-S., Choi, S.W., Kim, J.W., Kim, B.G. and Lee,**  
819 **K.L.** (2018) Walnut phenolic extract inhibits nuclear factor kappaB signaling in intestinal  
820 epithelial cells, and ameliorates experimental colitis and colitis-associated colon cancer  
821 in mice. *Eur J Nutr*.
- 822 **Kohorn, B.D., Johansen, S., Shishido, A., Todorova, T., Martinez, R., Defeo, E. and**  
823 **Obregon, P.** (2009) Pectin activation of MAP kinase and gene expression is WAK2  
824 dependent. *The Plant Journal*, **60**, 974–982.
- 825 **Kohorn, B.D., Kohorn, S.L., Saba, N.J. and Meco-Martinez, V.** (2014) Requirement for  
826 Pectin Methyl Esterase and Preference for Fragmented Over Native Pectins for Wall

- 827 Associated Kinase Activated, EDS1/PAD4 Dependent Stress Response in Arabidopsis. *J.*  
828 *Biol. Chem.*, jbc.M114.567545.
- 829 **Lee, C., Teng, Q., Zhong, R. and Ye, Z.-H.** (2011) The Four Arabidopsis REDUCED  
830 WALL ACETYLATION Genes are Expressed in Secondary Wall-Containing Cells and  
831 Required for the Acetylation of Xylan. *Plant Cell Physiol*, **52**, 1289–1301.
- 832 **Luo, M.-C., You, F.M., Li, P., et al.** (2015) Synteny analysis in Rosids with a walnut  
833 physical map reveals slow genome evolution in long-lived woody perennials. *BMC*  
834 *Genomics*, **16**, 707.
- 835 **Lyons, E., Pedersen, B., Kane, J. and Freeling, M.** (2008) The Value of Nonmodel  
836 Genomes and an Example Using SynMap Within CoGe to Dissect the Hexaploidy that  
837 Predates the Rosids. *Tropical Plant Biol.*, **1**, 181–190.
- 838 **Magallón, S., Gómez-Acevedo, S., Sánchez-Reyes, L.L. and Hernández-Hernández, T.**  
839 (2015) A metacalibrated time-tree documents the early rise of flowering plant  
840 phylogenetic diversity. *New Phytologist*, **207**, 437–453.
- 841 **Manabe, Y., Nafisi, M., Verhertbruggen, Y., et al.** (2011) Loss-of-Function Mutation of  
842 REDUCED WALL ACETYLATION2 in Arabidopsis Leads to Reduced Cell Wall  
843 Acetylation and Increased Resistance to Botrytis cinerea. *Plant Physiology*, **155**, 1068–  
844 1078.
- 845 **Manchester, S.R.** (1987) The fossil history of the Juglandaceae. *Monogr.Syst.Bot.Missouri*  
846 *Bot.Gard.*, **21**, 1–137.
- 847 **Marakli, S. and Gozukirmizi, N.** (2018) Analyses of abiotic stress and brassinosteroid-  
848 related some genes in barley roots grown under salinity stress and HBR treatments:  
849 Expression profiles and phylogeny. *Plant Biosystems - An International Journal Dealing*  
850 *with all Aspects of Plant Biology*, **152**, 324–332.
- 851 **Marrano, A., Martínez-García, P.J., Bianco, L., et al.** (2018) A new genomic tool for  
852 walnut (*Juglans regia* L.): development and validation of the high-density Axiom™ *J.*  
853 *regia* 700K SNP genotyping array. *Plant Biotechnology Journal*, **0**.
- 854 **Martínez-García, P.J., Famula, R.A., Leslie, C., McGranahan, G.H., Famula, T.R. and**  
855 **Neale, D.B.** (2017) Predicting breeding values and genetic components using



- 856 generalized linear mixed models for categorical and continuous traits in walnut (*Juglans*  
857 *regia*). *Tree Genetics & Genomes*, **13**, 109.
- 858 **Masachis, S., Segorbe, D., Turrà, D., et al.** (2016) A fungal pathogen secretes plant  
859 alkalizing peptides to increase infection. *Nature Microbiology*, **1**, 16043.
- 860 **McGranahan, G.H., Leslie, C.A., Uratsu, S.L., Martin, L.A. and Dandekar, A.M.** (1988)  
861 *Agrobacterium*-Mediated Transformation of Walnut Somatic Embryos and  
862 Regeneration of Transgenic Plants. *Bio/Technology*, **6**, 800.
- 863 **Ming, R., Hou, S., Feng, Y., et al.** (2008) The draft genome of the transgenic tropical  
864 fruit tree papaya (*Carica papaya* Linnaeus). *Nature*, **452**, 991–996.
- 865 **Miyoshi, T.** In Praise of the Walnut.  
866 <http://www.poetryinternational.org/pi/site/poem/item/16382>
- 867 **Moral, J., Muñoz-Díez, C., González, N., Trapero, A. and Michailides, T.J.** (2010)  
868 Characterization and Pathogenicity of Botryosphaeriaceae Species Collected from Olive  
869 and Other Hosts in Spain and California. *Phytopathology*, **100**, 1340–1351.
- 870 **Oliver, M.** (2004) *New and Selected Poems, Volume One* Reprint edition., Beacon Press.
- 871 **Patterson, E.L., Pettinga, D.J., Ravet, K., Neve, P. and Gaines, T.A.** (2018) Glyphosate  
872 Resistance and EPSPS Gene Duplication: Convergent Evolution in Multiple Plant  
873 Species. *J Hered*, **109**, 117–125.
- 874 **Pina-Martins, F., Baptista, J., Pappas, G. and Paulo, O.S.** (2019) New insights into  
875 adaptation and population structure of cork oak using genotyping by sequencing.  
876 *Global Change Biology*, **25**, 337–350.
- 877 **Plomion, C., Aury, J.-M., Amselem, J., et al.** (2018) Oak genome reveals facets of long  
878 lifespan. *Nature Plants*, **4**, 440.
- 879 **Pinosio, S., Giacomello, S., Faivre-Rampant, P., et al.** (2016) Characterization of the  
880 Poplar Pan-Genome by Genome-Wide Identification of Structural Variation. *Mol Biol*  
881 *Evol*, **33**, 2706–2719.
- 882 **Pollegioni, P., Woeste, K.E., Chiocchini, F., Olimpieri, I., Tortolano, V., Clark, J.,**  
883 **Hemery, G.E., Mapelli, S. and Malvolti, M.E.** (2014) Landscape genetics of Persian  
884 walnut (*Juglans regia* L.) across its Asian range. *Tree Genetics & Genomes*, **10**, 1027–1043.

- 885 **Pope, K.S., Dose, V., Silva, D.D., Brown, P.H., Leslie, C.A. and DeJong, T.M.** (2013)  
886 Detecting nonlinear response of spring phenology to climate change by Bayesian  
887 analysis. *Global Change Biology*, **19**, 1518–1525.
- 888 **Potter, D., Gao, F., Baggett, S., McKenna, J.R. and McGranahan, G.H.** (2002) Defining  
889 the sources of Paradox: DNA sequence markers for North American walnut (*Juglans* L.)  
890 species and hybrids. *Scientia Horticulturae*, **94**, 157–170.
- 891 **Prunier, J., Giguère, I., Ryan, N., Guy, R., Soolanayakanahally, R., Isabel, N., MacKay,**  
892 **J. and Porth, I.** (2019) Gene copy number variations involved in balsam poplar (*Populus*  
893 *balsamifera* L.) adaptive variations. *Molecular Ecology*, **28**, 1476–1490.
- 894 **Richter, J., Ploderer, M., Mongelard, G., Gutierrez, L. and Hauser, M.-T.** (2017) Role of  
895 CrRLK1L Cell Wall Sensors HERCULES1 and 2, THESEUS1, and FERONIA in Growth  
896 Adaptation Triggered by Heavy Metals and Trace Elements. *Front Plant Sci*, **8**.
- 897 **Richter, J., Watson, J.M., Stasnik, P., Borowska, M., Neuhold, J., Berger, M., Stolt-**  
898 **Bergner, P., Schoft, V. and Hauser, M.-T.** (2018) Multiplex mutagenesis of four  
899 clustered CrRLK1L with CRISPR/Cas9 exposes their growth regulatory roles in  
900 response to metal ions. *Scientific Reports*, **8**, 12182.
- 901 **Settle, J., M., S. and Gonso, C.** (2015) 2015 Indiana Forest Products Price Report and  
902 Trend Analysis. *Purdue Univ., Dept. For. Nat. Resour.*, **October**, 17.
- 903 **Simão, F.A., Waterhouse, R.M., Ioannidis, P., Kriventseva, E.V. and Zdobnov, E.M.**  
904 (2015) BUSCO: assessing genome assembly and annotation completeness with single-  
905 copy orthologs. *Bioinformatics*, **31**, 3210–3212.
- 906 **Singh, D., Bhaganagare, G., Bandopadhyay, R., Prabhu, K.V., Gupta, P.K. and**  
907 **Mukhopadhyay, K.** (2012) Targeted spatio-temporal expression based characterization  
908 of state of infection and time-point of maximum defense in wheat NILs during leaf rust  
909 infection. *Mol Biol Rep*, **39**, 9373–9382.
- 910 **Singh, R., Ong-Abdullah, M., Low, E.-T.L., et al.** (2013) Oil palm genome sequence  
911 reveals divergence of interfertile species in Old and New worlds. *Nature*, **500**, 335–339.
- 912 **Slater, G.S.C. and Birney, E.** (2005) Automated generation of heuristics for biological  
913 sequence comparison. *BMC Bioinformatics*, **6**, 31.

- 914 **Smit, A., Hubley, R. and Green, P.** RepeatMasker.  
915 <http://www.repeatmasker.org/>
- 916 **Stanke, M., Diekhans, M., Baertsch, R. and Haussler, D.** (2008) Using native and  
917 syntenically mapped cDNA alignments to improve de novo gene finding. *Bioinformatics*,  
918 **24**, 637–644.
- 919 **Stevens, K.A., Woeste, K., Chakraborty, S., et al.** (2018) Genomic Variation Among and  
920 Within Six *Juglans* Species. *G3: Genes, Genomes, Genetics*, **8**, 2153–2165.
- 921 **Sui, S., Luo, J., Liu, D., Ma, J., Men, W., Fan, L., Bai, Y. and Li, M.** (2015) Effects of  
922 Hormone Treatments on Cut Flower Opening and Senescence in Wintersweet  
923 (*Chimonanthus praecox*). *HortScience*, **50**, 1365–1369.
- 924 **Tuskan, G.A., Difazio, S., Jansson, S., et al.** (2006) The genome of black cottonwood,  
925 *Populus trichocarpa* (Torr. & Gray). *Science*, **313**, 1596–1604.
- 926 **Tuskan, G.A., Groover, A.T., Schmutz, J., et al.** (2018) Hardwood Tree Genomics:  
927 Unlocking Woody Plant Biology. *Front. Plant Sci.*, **9**.
- 928 **Van Bel, M., Bucchini, F. and Vandepoele, K.** (2019) Gene space completeness in  
929 complex plant genomes. *Current Opinion in Plant Biology*, **48**, 9–17.
- 930 **Vijay, N., Poelstra, J.W., Künstner, A. and Wolf, J.B.W.** (2013) Challenges and  
931 strategies in transcriptome assembly and differential gene expression quantification. A  
932 comprehensive in silico assessment of RNA-seq experiments. *Molecular Ecology*, **22**, 620–  
933 634.
- 934 **Vu, D.C., Lei, Z., Sumner, L.W., Coggeshall, M.V. and Lin, C.-H.** (2019) Identification  
935 and quantification of phytosterols in black walnut kernels. *Journal of Food Composition  
936 and Analysis*, **75**, 61–69.
- 937 **Vu, D.C., Vo, P.H., Coggeshall, M.V. and Lin, C.-H.** (2018) Identification and  
938 Characterization of Phenolic Compounds in Black Walnut Kernels. *J. Agric. Food Chem.*,  
939 **66**, 4503–4511.
- 940 **Wagner, T.A. and Kohorn, B.D.** (2001) Wall-Associated Kinases Are Expressed  
941 throughout Plant Development and Are Required for Cell Expansion. *The Plant Cell*, **13**,  
942 303–318.

- 943 Wang, X., Xu, Y., Zhang, S., et al. (2017) Genomic analyses of primitive, wild and  
944 cultivated citrus provide insights into asexual reproduction. *Nature Genetics*, **49**, 765–  
945 772.
- 946 Weckerle, C., Huber, F.K., Yongping, Y. and Weibang, S. (2005) Walnuts among the  
947 Shuhi in Shuiluo, Eastern Himalayas. *Economic Botany*, **59**, 287–290.
- 948 Würschum, T., Langer, S.M., Longin, C.F.H., Tucker, M.R. and Leiser, W.L. (2018) A  
949 three-component system incorporating Ppd-D1, copy number variation at Ppd-B1, and  
950 numerous small-effect quantitative trait loci facilitates adaptation of heading time in  
951 winter wheat cultivars of worldwide origin. *Plant, Cell & Environment*, **41**, 1407–1416.
- 952 Xia, Y., Yin, S., Zhang, K., Shi, X., Lian, C., Zhang, H., Hu, Z. and Shen, Z. (2018)  
953 OsWAK11, a rice wall-associated kinase, regulates Cu detoxification by alteration the  
954 immobilization of Cu in cell walls. *Environmental and Experimental Botany*, **150**, 99–105.
- 955 Xu, H., Yu, X., Qu, S. and Sui, D. (2013) Juglone, isolated from *Juglans mandshurica*  
956 Maxim, induces apoptosis via down-regulation of AR expression in human prostate  
957 cancer LNCaP cells. *Bioorganic & Medicinal Chemistry Letters*, **23**, 3631–3634.
- 958 Yang, Z. (2007) PAML 4: Phylogenetic Analysis by Maximum Likelihood. *Mol Biol Evol*,  
959 **24**, 1586–1591.
- 960 Yao, Y., Zhang, Y.-W., Sun, L.-G., et al. (2012) Juglanthraquinone C, a novel natural  
961 compound derived from *Juglans mandshurica* Maxim, induces S phase arrest and  
962 apoptosis in HepG2 cells. *Apoptosis*, **17**, 832–841.
- 963 Zhang, W., Jiao, Z., Shang, T. and Yang, Y. (2015) Demography and spectrum analysis  
964 of *Juglans cathayensis* populations at different altitudes in the west Tianshan valley in  
965 Xinjiang, China. *Ying Yong Sheng Tai Xue Bao*, **26**, 1091–1098.
- 966 Zhao, P., Zhou, H.-J., Potter, D., et al. (2018) Population genetics, phylogenomics and  
967 hybrid speciation of *Juglans* in China determined from whole chloroplast genomes,  
968 transcriptomes, and genotyping-by-sequencing (GBS). *Molecular Phylogenetics and*  
969 *Evolution*, **126**, 250–265.
- 970 Zhao, Q., Feng, Q., Lu, H., et al. (2018) Pan-genome analysis highlights the extent of  
971 genomic variation in cultivated and wild rice. *Nat Genet*, **50**, 278–284.

972 **Zhu, T., Wang, L., You, F.M., et al.** (2019) Sequencing a *Juglans regia* × *J. microcarpa*  
973 hybrid yields high-quality genome assemblies of parental species. *Hortic Res*, **6**, 1–16.

974

975

976

977

978

979

980

981

982

983

984

985

986

987

988

989

990

991

992

993

994

995

996

997

998

999

1000

1001

1002

1003

1004

1005

1006

1007

1008

1009

1010

1011 **Figure Legends:**

1012

1013 Figure 1: Approximate ranges of each annotated species with shapes denoting the three  
1014 sections of *Juglans* and the outgroup genus, *Pterocarya*.

1015

1016 Figure 2: As a measure of gene annotation completeness, the gene models from the  
1017 seven annotations were compared to a set of 1,440 embryophyta putative single-copy  
1018 orthologs using BUSCO (Benchmarking Universal Single-copy Orthologs) (Table S3).  
1019 Orthologs were either found once in the gene models (Complete Single), multiple times  
1020 (Complete Duplicated), partially (Fragmented), or were not found at all (Missing).

1021

1022 Figure 3 (A) Distribution of species membership across orthogroups. Tiling beneath the  
1023 histogram indicates the species contributing gene models to each orthogroup in the set.  
1024 Set size is displayed as height on histogram. The horizontal histogram indicates the  
1025 number of orthogroups found in each species. Blue indicates data from groups  
1026 composed of *Rhysocaryon* species while green bars show Eurasian species (*Dioscaryon*  
1027 and *Cardiocaryon*). B) Cladogram with associated stacked histogram reflecting the  
1028 number of genes belonging to orthogroups specific to the color-indicated groups.

1029

1030 Figure 4 Histograms of substitution rates for coding genes determined by SynMAP to  
1031 be syntenic between *Juglans hindsii* and *Pterocarya stenoptera*. Two peaks are visible in  
1032 both the non-synonymous (A) and synonymous (B) distributions. In both cases the  
1033 highlighted righthand peak represents the older WGD. Table S8 summarizes the  
1034 distributions for all annotated *Juglans* genomes described here against *P. stenoptera*.

1035

1036 Figure 5: Phylogenetic tree constructed from divergence times in literature displaying  
1037 numbers of expanded (blue) and contracted (red) orthogroups per terminal branch  
1038 discovered using OrthoFinder/CAFÉ with the 13 species Eurosid analysis. The number  
1039 of significant (P-value <0.05, Viterbi P-value <0.05) expansions and contractions at each  
1040 node and leaf are shown in parentheses.

1041

1042

1043

1044

1045

1046

1047

1048

1049

1050 **Tables:**

1051

1052

Table 1: Genome assembly statistics for seven Juglandaceae species

|                                                 | <i>Juglans hindsii</i> | <i>Juglans nigra</i> | <i>Juglans cathayensis</i> | <i>Juglans microcarpa</i> | <i>Juglans sigillata</i> | <i>Juglans regia</i> | <i>Pterocarya stenoptera</i> |
|-------------------------------------------------|------------------------|----------------------|----------------------------|---------------------------|--------------------------|----------------------|------------------------------|
| <b>Plant Info</b>                               |                        |                      |                            |                           |                          |                      |                              |
| <b>Name</b>                                     | 'Rawlins'              | 'Sparrow'            | 'Wild Walnut'              | '83-129'                  | 'Yangbi 1'               | 'Chandler'           | '83-13'                      |
| <b>Cultivar</b>                                 | DJUG105                | A30                  | DJUG11.03                  | DJUG29.11                 | DJUG951.04               | 64-172               | DPTE1.09                     |
| <b>Source</b>                                   | NCGR                   | MU                   | NCGR                       | NCGR                      | NCGR                     | UCD                  | NCGR                         |
| <b>Assembly</b>                                 |                        |                      |                            |                           |                          |                      |                              |
| <b>Version</b>                                  | 1.0                    | 1.0                  | 1.0                        | 1.0                       | 1.0                      | 1.1                  | 1.0                          |
| <b>Size (Mbp)</b>                               | 605.70                 | 605.05               | 751.37                     | 896.45                    | 622.24                   | 686.52               | 936.89                       |
| <b>Scaffolds</b>                                | 273,094                | 232,579              | 332,634                    | 329,873                   | 282,224                  | 186,636              | 396,056                      |
| <b>N50 (Kbp)</b>                                | 512.79                 | 118.45               | 158.25                     | 145.01                    | 218.35                   | 278.29               | 159.70                       |
| <b>Annotated Assembly (&gt; 3Kbp scaffolds)</b> |                        |                      |                            |                           |                          |                      |                              |
| <b>Size (Mbp)</b>                               | 586.05                 | 580.70               | 719.60                     | 862.79                    | 585.63                   | 686.52               | 902.23                       |
| <b>Scaffolds</b>                                | 4,672                  | 5,896                | 10,342                     | 12,024                    | 6,413                    | 11,848               | 11,574                       |
| <b>N50 (Kbp)</b>                                | 540.03                 | 271.37               | 168.53                     | 151.91                    | 238.36                   | 278.30               | 167.10                       |

1053

1054

Table 2: Structural and functional annotations for seven Juglandaceae species

|                              | <i>Juglans hindsii</i> | <i>Juglans nigra</i> | <i>Juglans cathayensis</i> | <i>Juglans microcarpa</i> | <i>Juglans sigillata</i> | <i>Juglans regia</i> | <i>Pterocarya stenoptera</i> |
|------------------------------|------------------------|----------------------|----------------------------|---------------------------|--------------------------|----------------------|------------------------------|
| <b>Structural Annotation</b> |                        |                      |                            |                           |                          |                      |                              |
| <b>Repeat Content</b>        | 46.97%                 | 47.34%               | 48.03%                     | 46.87%                    | 46.69%                   | 47.96%               | 43.89%                       |

|                               |          |          |          |          |          |          |          |
|-------------------------------|----------|----------|----------|----------|----------|----------|----------|
| Total Genes                   | 28,664   | 28,335   | 34,066   | 41,611   | 26,835   | 30,626   | 44,318   |
| Total Complete, Multi-exonics | 24,500   | 23,290   | 28,915   | 35,319   | 22,898   | 26,166   | 36,984   |
| Total Complete, mono-exons    | 4,164    | 4,426    | 5,151    | 6,292    | 3,937    | 4,460    | 7,334    |
| Gene Length (Avg)             | 4,406.38 | 4,301.45 | 4,193.80 | 4,008.01 | 4,373.40 | 4,235.02 | 3,944.81 |
| CDS Length (Avg)              | 1,267.37 | 1,277.62 | 1,220.28 | 1,199.12 | 1,250.97 | 1,220.42 | 1203.44  |
| Exons per Gene (Average)      | 6.30     | 6.38     | 6.06     | 5.98     | 6.32     | 6.14     | 5.91     |
| Canonical Splice Sites (%)    | 98.70%   | 98.67%   | 98.69%   | 98.70%   | 98.60%   | 98.77%   | 98.76%   |
| <b>Functional Annotation</b>  |          |          |          |          |          |          |          |
| EnTAP (Similarity Search)     | 23,822   | 23,607   | 27,815   | 33,711   | 22,036   | 25,420   | 35,771   |
| EnTAP (Gene Family only)      | 4,842    | 4,728    | 6,251    | 7,900    | 4,799    | 5,206    | 8,547    |

1055

1056



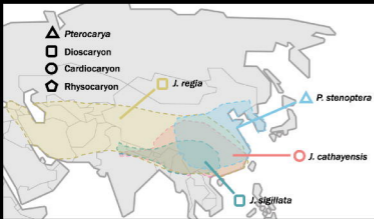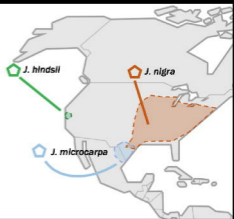

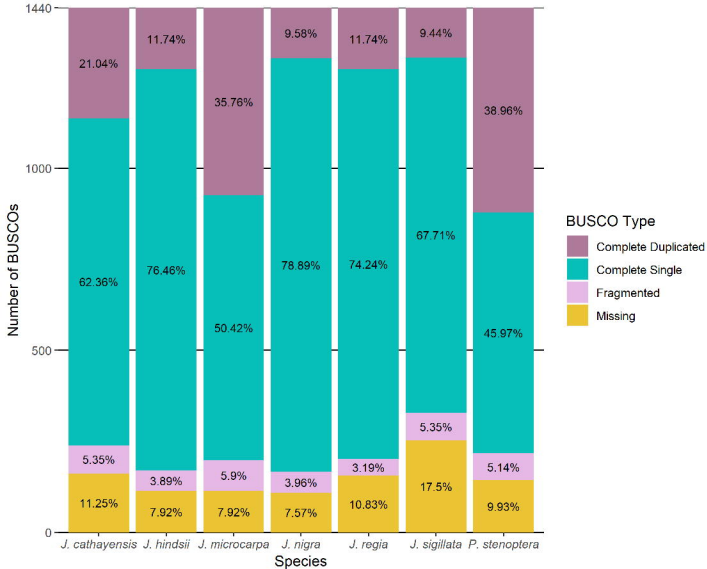

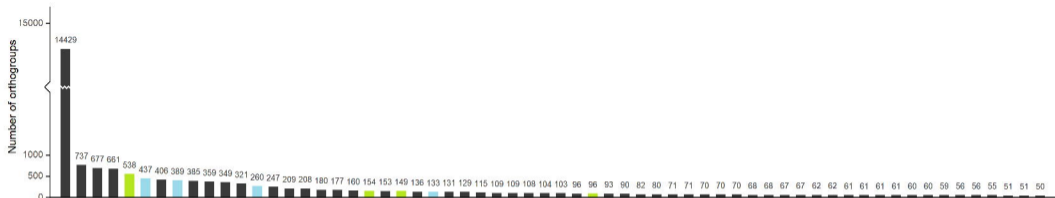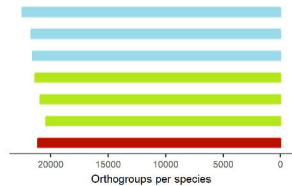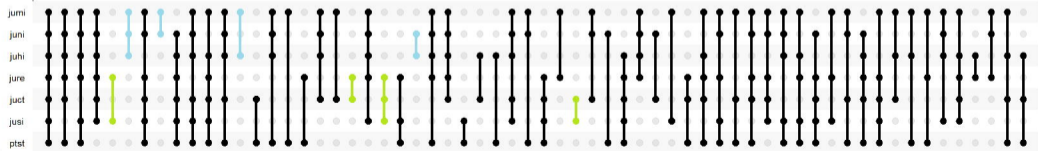

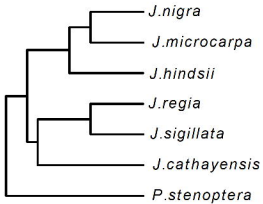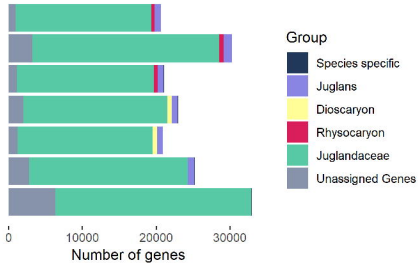

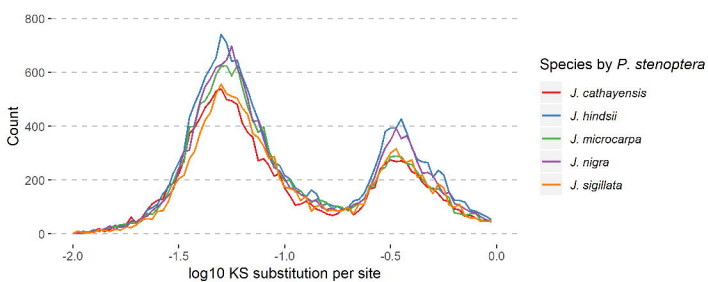

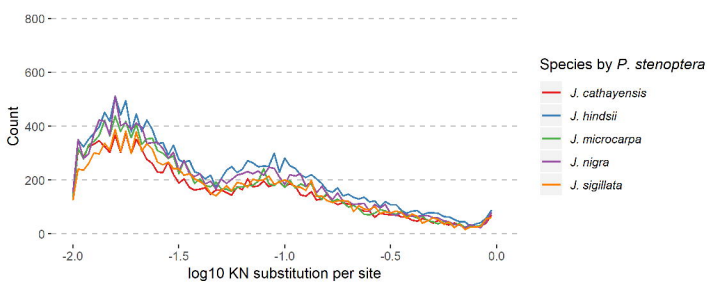

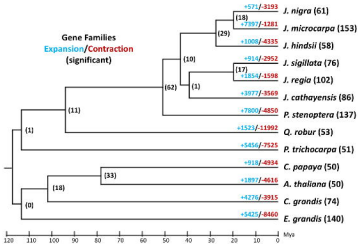

Source: https://www.biorxiv.org/content/10.1101/561738v2.full.pdf
